# Supplementary material for: Development of a one-pot RPA-cas12a/13a assay for simultaneous detection of HPV16 and HPV18
Source: Front Bioeng Biotechnol. 2025 Jul 17;13:1608301. doi: 10.3389/fbioe.2025.1608301 (PMC12310682; doi:10.3389/fbioe.2025.1608301)
Supplement: Supplementary file 1 [file Supplementaryfile5.xlsx]

## Sheet: Figure6
Figure 6
HPV16	HPV18	HPV52	HPV52	HPV33	HPV33	HPV58	HPV58	HPV39	HPV39	HPV51	HPV51	HCV	HCV	NC	NC
18871.8	2659.32	151.057	111.704	166.853	59.3152	121.223	47.6892	141.217	72.9953	180.64	72.9217	91.6839	68.4431	181.205	47.2557
19994.3	2236.81	188.405	156.243	166.409	102.232	121.984	43.5794	183.634	48.692	184.585	34.2392	120.049	77.6144	163.606	75.3915
15972.4	2286.39	172.155	86.1368	132.174	59.65	106.904	81.2509	181.963	54.6719	179.306	79.8025	82.5921	65.0777	157.237	54.4063
