# Supplementary material for: Development of a one-pot RPA-cas12a/13a assay for simultaneous detection of HPV16 and HPV18
Source: Front Bioeng Biotechnol. 2025 Jul 17;13:1608301. doi: 10.3389/fbioe.2025.1608301 (PMC12310682; doi:10.3389/fbioe.2025.1608301)
Supplement: Supplementary file 2 [file Supplementaryfile1.xlsx]

## Sheet: Figure 2
Figure2
Fluorescence
RPA Volume（µL）		HPV16			HPV18
10	6103	8189.43	6459.58	1001.34	1261.97	1498.75
15	9704.83	11885	12863.6	2079.35	2783.35	1798.69
20	19853.4	20750	18914.7	3471.56	3284.45	3365.54
25	23530	19457.9	19516.9	3632.59	3567.21	3777.87
50	23074.1	21572.1	24043.3	3843.43	3714.55	3696.46
NC	170.491	161.235	176.935	33.4148	42.7658	45.1526
Fluorescence
RPA reaction time（min）		HPV16			HPV18
10	11913.8	12915.9	12497	1526.09	1200.73	1465.81
15	14182.9	12382.9	15447	1552.18	1665.22	1630.84
20	20355.8	17851.3	22632.8	2507.38	2144.98	2781.73
25	21494.3	21368.1	20490.4	2781.58	2441.88	2883.98
30	23894.3	21347.2	20013.2	2818.24	2587.32	2824.62
NC	268.453	204.926	238.397	30.9872	27.1584	31.759
