# Supplementary material for: Development of a one-pot RPA-cas12a/13a assay for simultaneous detection of HPV16 and HPV18
Source: Front Bioeng Biotechnol. 2025 Jul 17;13:1608301. doi: 10.3389/fbioe.2025.1608301 (PMC12310682; doi:10.3389/fbioe.2025.1608301)
Supplement: Supplementary file 3 [file Supplementaryfile2.xlsx]

## Sheet: Figure3
Figure3A	Fluorescence				Figure3B	Fluorescence				Figure3C	Fluorescence
mins	SSDNA Probe	SSRNA Probe	NC		mins	SSDNA Probe	SSRNA Probe	NC		HPV16	HPV18	NC
1	932.2	32.1	171.1		1	231.056	76.83	13.21		19732.3	1504.69	19.861
2	1612.9	34.5	172		2	231.706	142.88	13.4		17258.1	2092.38	18.4093
3	2423.7	37	173.3		3	232.115	229.99	13.68		19411.9	2335.11	15.2566
4	3319.9	40.2	174.1		4	232.522	326.38	13.84
5	4262.7	43.4	175.1		5	232.829	434.94	13.84
6	5216	47.6	175.8		6	233.25	549.27	13.97
7	6156.3	51.4	176.6		7	233.626	666.01	14.25
8	7059.2	55.6	177.1		8	233.929	783.3	14.32
9	7912.4	59.9	177.9		9	233.997	898.44	14.55
10	8706.1	64.3	179		10	234.53	1009.28	14.4
11	9436.4	68.8	179.9		11	234.703	1114.18	14.78
12	10102	73.4	180.6		12	234.965	1213.6	14.89
13	10706.2	78.3	181.4		13	235.095	1306.46	14.84
14	11250.5	82.8	182.1		14	235.303	1391.36	15.08
15	11742.8	87.7	183		15	235.561	1469.19	15.15
16	12183.4	92.5	183.7		16	235.667	1540.36	15.07
17	12580.9	97.5	184.6		17	235.864	1604.15	15.49
18	12942.3	102.4	185.1		18	236.128	1661.43	15.4
19	13263.5	107.2	185.7		19	236.351	1712.85	15.44
20	13553.7	112.1	186.1		20	236.451	1757.83	15.84
21	13812.6	117	186.7		21	236.61	1798.15	15.85
22	14049.6	121.9	187.4		22	236.741	1833.42	15.92
23	14268.3	126.9	188.2		23	237.122	1864.39	15.87
24	14464.3	131.8	188.9		24	237.375	1891.67	16.24
25	14640.4	136.5	189.6		25	237.661	1915.62	16.39
26	14804.7	141.5	190.1		26	237.808	1936.54	16.24
27	14960.1	146.5	190.3		27	238.075	1955.3	16.39
28	15107.6	151.6	192		28	238.141	1970.67	16.48
29	15243.1	156.7	193.6		29	238.435	1984.13	16.73
30	15373.6	161.5	195		30	238.722	1995.77	16.59
