# Supplementary material for: Development of a one-pot RPA-cas12a/13a assay for simultaneous detection of HPV16 and HPV18
Source: Front Bioeng Biotechnol. 2025 Jul 17;13:1608301. doi: 10.3389/fbioe.2025.1608301 (PMC12310682; doi:10.3389/fbioe.2025.1608301)
Supplement: Supplementary file 4 [file Supplementaryfile6.xlsx]

## Sheet: Figure7
Figure 7
HPV16	Fluorescence			HPV18	Fluorescence
Positive	Negative			Positive	Negative
20361.7	221.638			2274.77	52.1264
5580.09	158.738			822.9	48.0721
10050.5	261.918			344.12	43.3314
17835.1	116.772			1530.89	91.3915
2143.24	577.784			750.86	44.1036
441.82	167.87			360.392	167.646
4623.46	243.148			716.234	28.6159
7686.7	233.324			746.747	50.2816
14198.8	217.973			358.503	34.6651
10501.2	201.886			2551.36	61.093
920.452	100.82			423.426	39.8777
8783.36	242.165			457.17	63.9047
11698.6	121.574			426.412	51.0752
3288.53	412.492			1153.81	44.3825
2837.05	227.798			409.39	87.7997
6226.45	140.485			670.614	89.6659
5497.99	152.717			670.614	149.433
3292.59	259.24			1512.32	134.154
10553.2	378.877			622.25	40.9415
4521.78	195.683			1932.28	93.134
7514.56	161.95			1859.04	33.5
7032.41	205.404			262.614	37.46
3333.1	920.338			290.658	73.35
3808.93	205.259			2484.93	53.41
8106.96	225.289			1202.22	38.25
6525.35	141.74			719.21	12.44
9290.14	108.989			56.76	28.29
12427.6	426.212			844.208	26.34
20326.7	118.643			1471.54	23.44
7720.44	171.423			1170.27	28.48
8995.83	148.326			881.922	20.69
5045.97	74.0728			1909.91	41.8
7739.39	580.222			1392.22	51.285
11290.5	74.0728			623.414	20.795
7364.16	104.297			2104.48	23.301
6133.07	79.8471			374.794	25.4
8977.88	184.596			1202.22	16.7
12002	178.641			1512.32	18.9
16970.9	167.002			670.614	22.2
9681.43	153.739			362.222	13.5
8237.24	177.919			290.906	12.6
7227.83	89.3205			942.903	11.2
7717.2	151.836			574.099	20.3
4480.19	412.471				21.32
16593.3	38.9672				14.4
8735	303.058				12.34
3232.41	441.82				18.34
4200.86	167.363				26.8
9145.78	470.358				11.7
7421.63	180.922				16.2
11357.6	159.211				22.89
8224.52	44.3625				23.45
8129.88	139.172				30.3
13038.3	605.046				25.34
16580.9	60.5538				18.23
8773.61	57.4718				19.2
12120.3	61.8476				22.9
22568.3	68.9211				29
10191	58.6989				12.23
7861.73					15.67
6696.96					16.78
11013.1					17.89
7063.26					14.65
9273.81					19.67
6240.52					20.56
3556.04					21.33
16865.1					15.3
11196.3					17.8
7875.72					24.5
8850.21					19.8
12464.3					35.6
11737.8					15.3
20251.3					16.4
10665.8					18.5
7188.67					32.3
8440.87					27.5
7998.87					22.34
20268.8					16.3
6469.87					10.34
12065.7					16.4
4319.95					14.6
6433.6					18.43
8921.94					9.45
10741.5					19.4
16075.8					19.34
5555.91					20.34
3886.88					23.53
15488.9					25.3
6634.58					21.23
7460.11					20.1
11054.4					34.2
					30.2
					29.34
					27.3
					26.43
					28.34
					20.24
					18.3
					19.34
					34.23
					32.23
					26.3
					17.54
					12.4
					16.35
					35.2
					34.7
