# Supplementary material for: Development of a one-pot RPA-cas12a/13a assay for simultaneous detection of HPV16 and HPV18
Source: Front Bioeng Biotechnol. 2025 Jul 17;13:1608301. doi: 10.3389/fbioe.2025.1608301 (PMC12310682; doi:10.3389/fbioe.2025.1608301)
Supplement: Supplementary file 5 [file Supplementaryfile4.xlsx]

## Sheet: Figure5
Figure5
5A-HPV16sensitivity
105	104	103	102	101	100	NC
33850.9	25086.2	22279.3	19932.7	7085.85	7052.96	83.1424
29527.4	18723.5	15663.8	14206.5	9810.71	4304.94	69.0746
30002.3	23904.4	19343.7	18733.2	10818.4	6650.22	60.5928
5B-HPV18sensitivity
105	104	103	102	101	100	NC
2612.69	2352.48	1815.45	928.714	796.335	104.35	20.7599
3357.45	2806.47	1455.82	1204.57	806.614	80.1658	23.5417
2711.75	2403.84	1637.79	1232.18	824.466	59.6027	20.2507
5C-HPV16/18sensitivity
		HPV16			HPV18
105	23636.2	25883.5	22464	3002.98	2831.7	2616.86
104	17898.1	18801.2	20640.7	2419.22	2600.44	2282.01
103	16414.6	16950.1	16079.9	2115.15	2117.59	1743.07
102	14762.2	13193.1	13104.1	1194.72	924.628	1184.32
101	5263.14	5649.38	5684.29	880.953	729.894	747.81
100	234.224	208.658	167.013	75.1039	91.664	82.6161
NC	173.81	179.016	156.424	27.592	27.3612	24.3189
