# Supplementary material for: Development of a one-pot RPA-cas12a/13a assay for simultaneous detection of HPV16 and HPV18
Source: Front Bioeng Biotechnol. 2025 Jul 17;13:1608301. doi: 10.3389/fbioe.2025.1608301 (PMC12310682; doi:10.3389/fbioe.2025.1608301)
Supplement: Supplementary file 7 [file Supplementaryfile3.xlsx]

## Sheet: Figure4
Figure4
4A Fluorescence
66：66	66：133	66:266	66:533	133：66	133：133	133:266	133:533	266:66	266:133	266:266	266:533	533:66	533:133	533:266	533:533	NC
14064.2	20767.4	15876.5	8916.88	16779.1	19947.5	14281.2	18717.8	16696.9	14358.3	24817.5	17448.3	13129.2	14697.8	26839.3	26376.7	161.626
13243.2	11029.5	7624.51	8935.86	11356.7	15957.9	14496.4	17483.1	12723.3	20838.4	26376.7	18952.2	12906	15935.8	21443	22740.5	135.109
16747.1	17080.3	15352.6	11166.5	15954.2	13627	16511.1	13263.4	17549.2	14766	23222.7	17709	13738.8	19198.3	20135.9	22169.7	255.752
4B-Cas12a reaction time（min）
10	15	20	25	30	NC
13019.2	15802.4	19949.4	25363.3	25838.5	229.6
13886.7	15353.8	19790.8	21709.2	21893.6	228.7
11010.7	14848.9	19475.9	20193.2	23679.0	227.8
4C
50：50	50：100	50：200	50：400	100：50	100：100	100：200	100：400	200：50	200：100	200：200	200：400	400：50	400：100	400：200	400：400	NC
3085.07	2429.01	3360.17	2450.58	2598.02	1613.42	2437.69	1596.85	1635.76	2676.33	2304.36	1592.47	1296.75	1296.75	1793.57	2749.48	9.68387
2662.78	1835.24	2764.61	1675.1	1932.5	1546.37	1326.01	916.413	1631.4	1845.31	1429.55	1215.53	992.798	992.798	1676.91	1860.3	12.4566
2871.78	2380.52	2960.65	1900.12	2019.42	1589.85	1670.47	1019.68	1754.4	1672.95	1673.77	1516.61	1073.16	913.451	1755.22	1920.6	14.2502
4D-Cas13a reaction time（min）
10	15	20	25	30	NC
1700.14	1914.18	1949.41	1969.99	1988.14	18.48
1744.89	1948.81	1970.79	1989.93	1982.84	19.97
1626.86	1924.80	2023.18	2056.08	2068.79	16.59
4E-rNTPmix
1mM	2mM	4mM	NC
1988.14	2200.38	1046.03	18.12
1982.84	1759.3	1375.35	23.99
2103.23	1823.24	1233.23	17.23
4F-T7 RNA
1U/μL	2U/μL	4U/μL	NC
2112.62	1988.14	1208.67	16.59
2068.79	1982.84	1067.65	19.97
2003.23	2018.23	1233.32	17.23
4G
temperature		HPV16			HPV18
35℃	12945.5	10343.4	13354.6	1043.34	1432.4	1072.3
37℃	17045.5	19343.5	20355.5	1833.4	1645.3	1934.3
39℃	16948.5	17344.5	19354.5	1923.4	1827.3	1834.4
42℃	13945.5	15453.5	13945.5	1094.5	1189.44	1364.87
45℃	12004.4	14945.5	12484.4	1248.34	1157.78	1076.76
NC	220.4	293.3	203.45	32.3	26.7	28.78
